# Supplementary material
Source: PubMed Central journal article supplement (PMC9329201)

**Supplemental Digital Content 2.** Drawing showing anatomical location of intracranial pressure monitor 10mm burr hole site. Picture reflects surgical pen marking at brow line and then at midline. The bur hole is created 1cm from midline and above brow line.

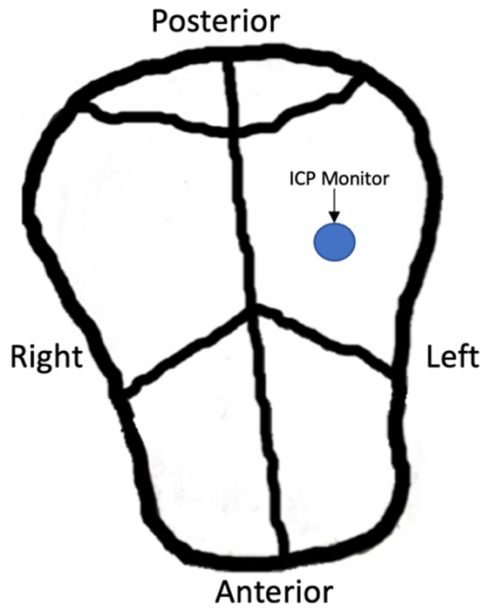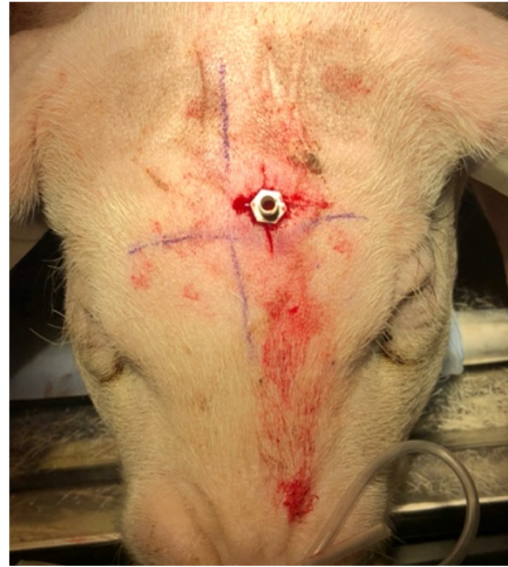

Supplement: NIHMS1803944-supplement-Supplemental_Data_File___doc___tif__pdf__etc___2.pdf [file NIHMS1803944-supplement-Supplemental_Data_File___doc___tif__pdf__etc___2.pdf]
