# Supplementary material
Source: PubMed Central journal article supplement (PMC9329201)

**Supplemental Digital Content 3:** Image of vascular access for arterial line; First image of surgical cutdown to axillary artery and isolation of artery using silk 2-0 ties; 2<sup>nd</sup> image with completed 5Fr sheath placed into isolated artery for invasive arterial pressure readings

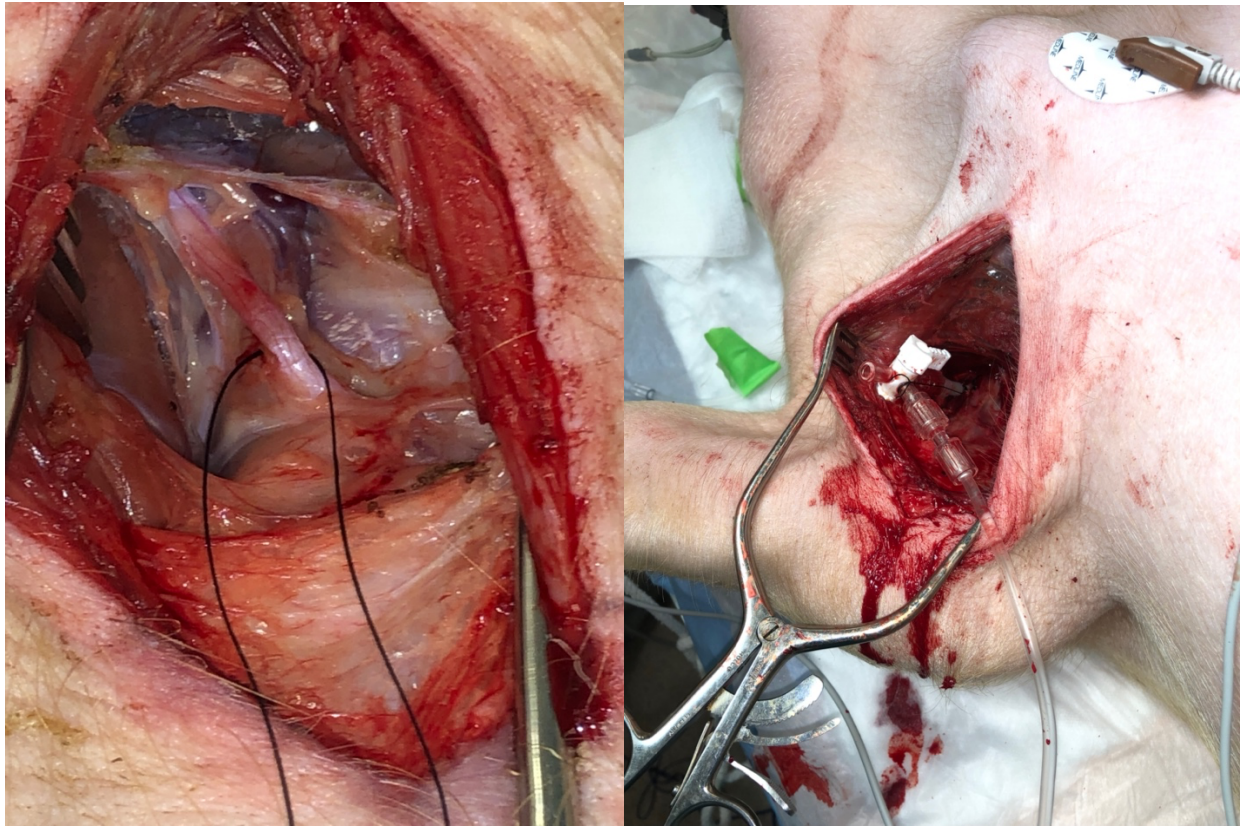

Supplement: NIHMS1803944-supplement-Supplemental_Data_File___doc___tif__pdf__etc___3.pdf [file NIHMS1803944-supplement-Supplemental_Data_File___doc___tif__pdf__etc___3.pdf]
