# Supplementary material
Source: PubMed Central journal article supplement (PMC9329201)

#### Supplemental Digital Content 4:

Image of swine placed inside the Mobile Shock Tube in preparation of blast pressure wave. Below image shows location of the Mobile Shock Tube Laboratory managed by Applied Research Associates (Littleton, Co). The shock tube is capable of generating incident pressures more than 80 pounds per square inch (550 kPa). The 8-foot expansion tube results in high-impulse loads with blast wave durations in excess of 5 milliseconds. The blast loads generated have been verified against free field blasts of the same magnitude. Schematic image of the inside of the mobile shock tube was created and supplied by Applied Research Associates.

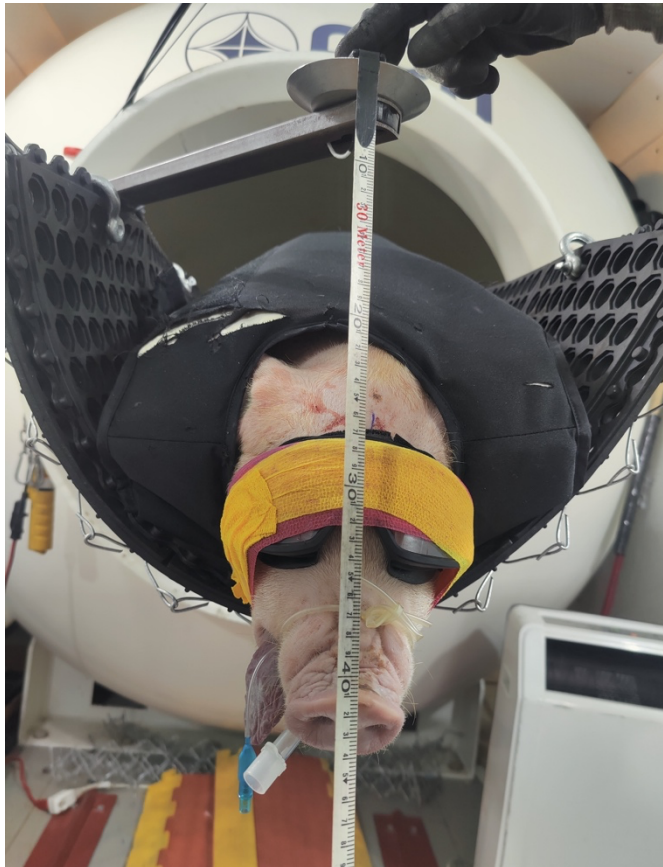

Supplement: NIHMS1803944-supplement-Supplemental_Data_File___doc___tif__pdf__etc___4.pdf [file NIHMS1803944-supplement-Supplemental_Data_File___doc___tif__pdf__etc___4.pdf]
