# Supplementary material
Source: PubMed Central journal article supplement (PMC9329201)

**Supplemental Digital Content 5:** Location of femoral catheters and direct visualization of femur fracture from captive bolt stun gun. A 12Fr ECMO catheter is placed in the femoral artery and a 7Fr catheter is placed in the other femoral artery. A 10Fr catheter is placed in the femoral vein for resuscitation. The femur are fractured using a captive bolt stunner and direct visualization confirms femur fragmentation.

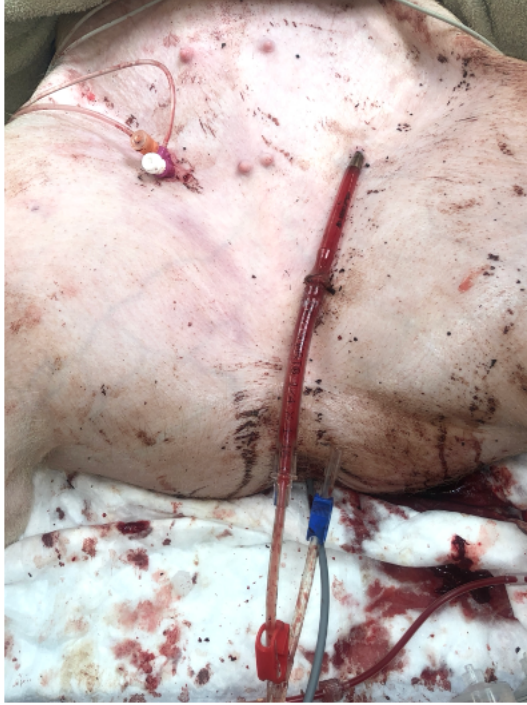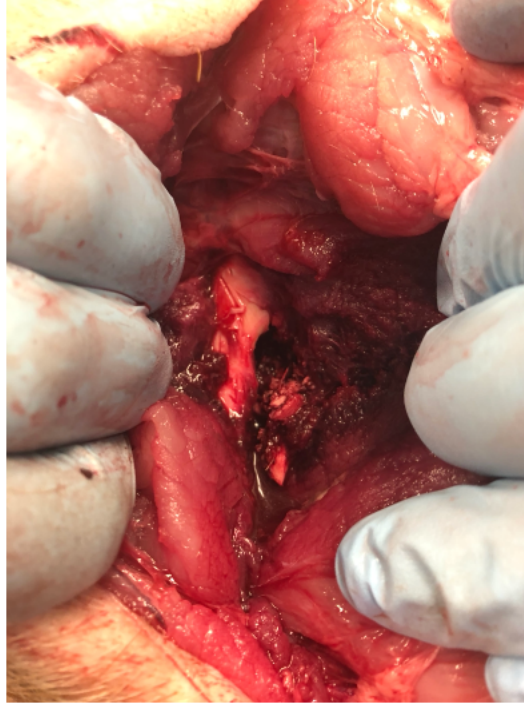

Supplement: NIHMS1803944-supplement-Supplemental_Data_File___doc___tif__pdf__etc___5.pdf [file NIHMS1803944-supplement-Supplemental_Data_File___doc___tif__pdf__etc___5.pdf]
