# Supplementary material
Source: PubMed Central journal article supplement (PMC9329201)
Supplement: NIHMS1803944-supplement-Supplemental_Data_File___doc___tif__pdf__etc___6.pdf [file NIHMS1803944-supplement-Supplemental_Data_File___doc___tif__pdf__etc___6.pdf]

**Supplemental Digital Content 6. Physiologic variables and laboratory values of each model at baseline;** variables are represented as means with standard deviations. The groups were considered clinically similar at baseline.

|                        | SHAM         | DCBI         |
|------------------------|--------------|--------------|
| <b>MAP</b>             | 64.4 (8.1)   | 73.5 (16.4)  |
| <b>SBP</b>             | 92.6 (22.6)  | 105.5 (14.8) |
| <b>EtCO2</b>           | 31.2 (2.9)   | 36.6 (4.1)   |
| <b>HR</b>              | 64.4 (19.5)  | 76 (21.8)    |
| <b>BE</b>              | 10.0 (4.0)   | 10.3 (2.2)   |
| <b>Ionized Calcium</b> | 1.3 (0.3)    | 1.3 (0.1)    |
| <b>Na</b>              | 139.6 (2.2)  | 142.1 (3.4)  |
| <b>K</b>               | 4.5 (0.6)    | 5.1 (0.8)    |
| <b>HCT</b>             | 26.2 (1.5)   | 28.9 (1.8)   |
| <b>Hgb</b>             | 8.9 (0.5)    | 9.8 (0.6)    |
| <b>Glucose</b>         | 115.6 (21.4) | 121.4 (20.0) |
