# Supplementary material
Source: PubMed Central journal article supplement (PMC9329201)

**Supplemental Digital Content 7:** Electrolytes and glucose are monitored throughout the model. Na levels remained constant throughout the experiment in both groups. Ca and K trended lower in the DCBI Models but are near SHAM levels at completion. Whole blood resuscitation for the DCBI group was supplemented with 1g CaCl. Glucose remained constant in the SHAM model, but decreased significantly in the DCBI group ( $p < 0.05$ ) reaching a final  $82.3 \pm 15.1$  mg/dL in the DCBI group compared to the  $126 \pm 15.3$  mg/dL in the SHAM group ( $p = 0.01$ ).

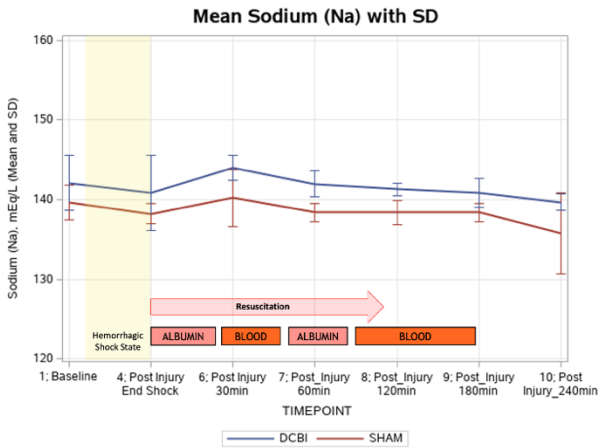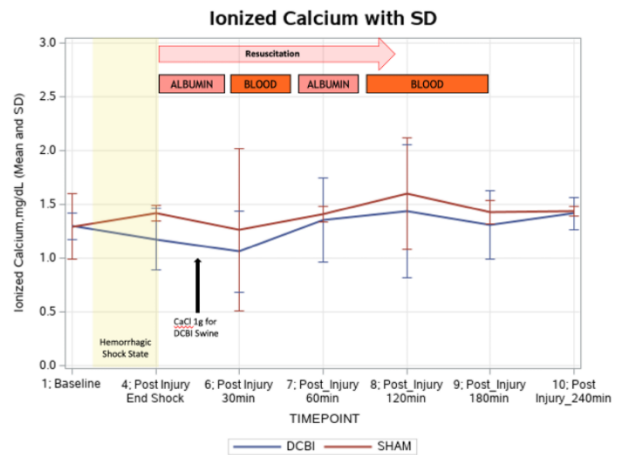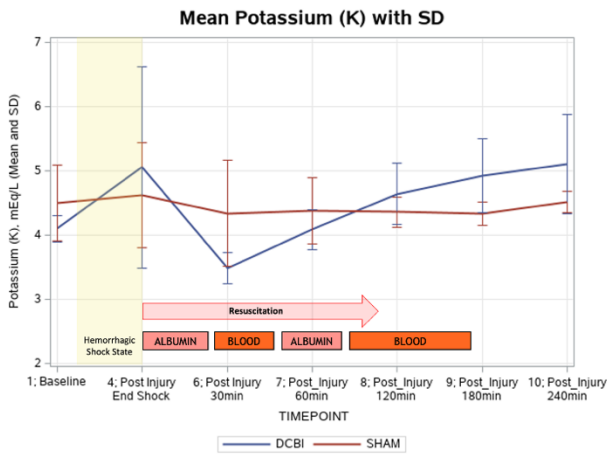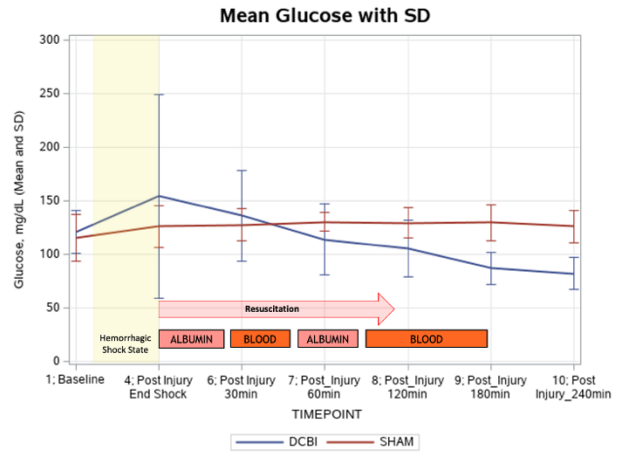

Supplement: NIHMS1803944-supplement-Supplemental_Data_File___doc___tif__pdf__etc___7.pdf [file NIHMS1803944-supplement-Supplemental_Data_File___doc___tif__pdf__etc___7.pdf]
